# Supplementary material for: Zeolitic Imidazole Framework (ZIF)–Sponge Composite for Highly Efficient U(VI) Elimination
Source: MDPI journal article supplement (doi:10.3390/molecules29020408), 2024-01-15
Supplement: s1 [file s1]

# Supplementary Material

## Zeolitic Imidazole Framework (ZIF)–Sponge Composite for Highly Efficient U(VI) Elimination

Shengxia Duan <sup>1,2</sup>, Xinshu Long <sup>1</sup>, Jian Liu <sup>3,\*</sup>, Xiaomin Jin <sup>1</sup>, Guihong Zhao <sup>3,\*</sup>, Jiaxing Li <sup>2</sup> and Zaidao Liu <sup>4</sup>

<sup>1</sup> Department of Chemistry and Engineering, Heze University, Heze 274500, China;  
duanshengxia@hezeu.edu.cn (S.D.); longxinshu@sina.com (X.L.);  
17661369763@163.com (X.J.)

<sup>2</sup> CAS Key Laboratory of Photovoltaic and Energy Conservation Materials, Institute of Plasma Physics, Chinese Academy of Sciences, Hefei 230031, China; lijx@ipp.ac.cn

<sup>3</sup> College of Agriculture and Bioengineering, Heze University, Heze 274000, China

<sup>4</sup> China National Nuclear Corporation Shaoguan JinYuan Uranium Co., Ltd., Shaoguan 512000, China; f15964152031@163.com

\* Correspondence: liujianscholar@163.com (J.L.); sdzgh100@163.com (G.Z.)

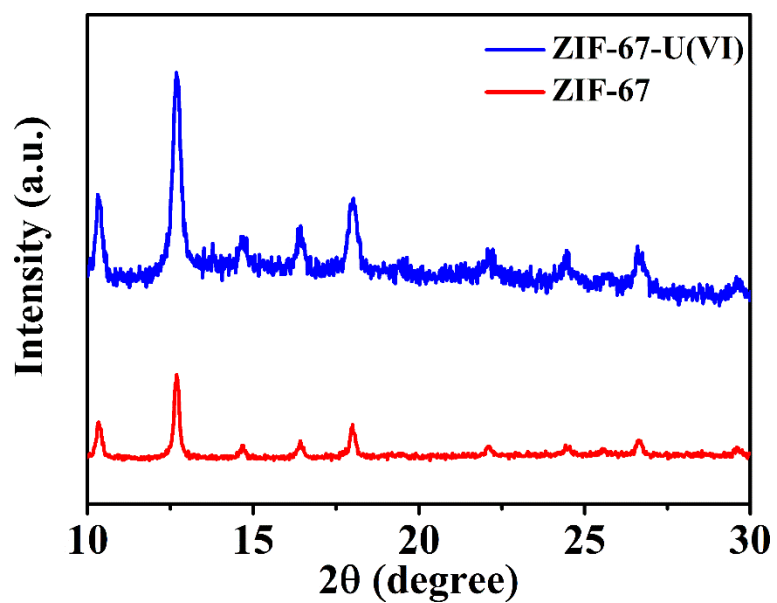

**Figure S1** XRD patterns of obtained ZIF-67 material.

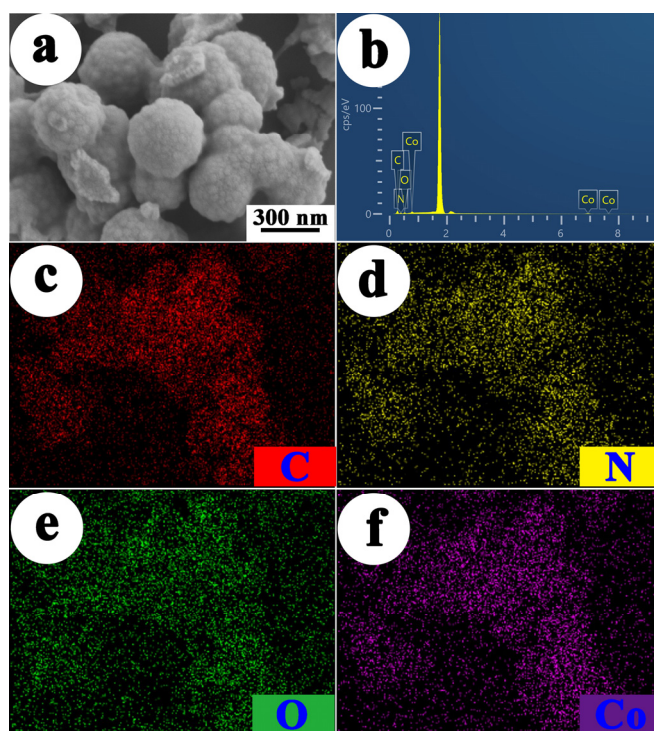

**Figure S2** (a) SEM image of the ZIF-67, (b) Corresponding EDS examination, (c–f) Elemental mapping images of ZIF-67.

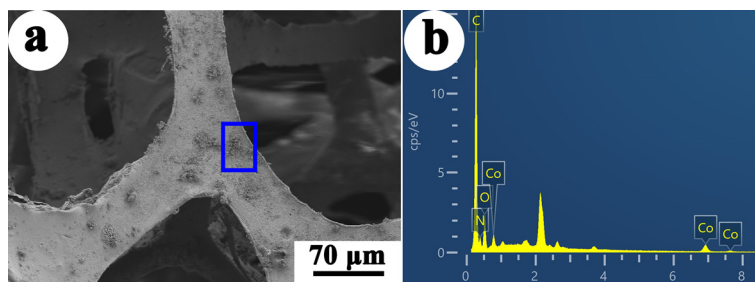

**Figure S3** (a) SEM image of the ZIF-67-PU, (b) Corresponding EDS examination of ZIF-67-PU.

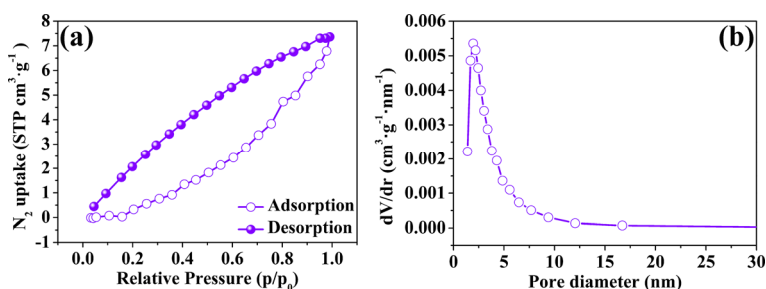

**Figure S4** (a)  $N_2$  adsorption-desorption isotherms PU, (b) pore size distribution plot of PU calculated using the BJH method.

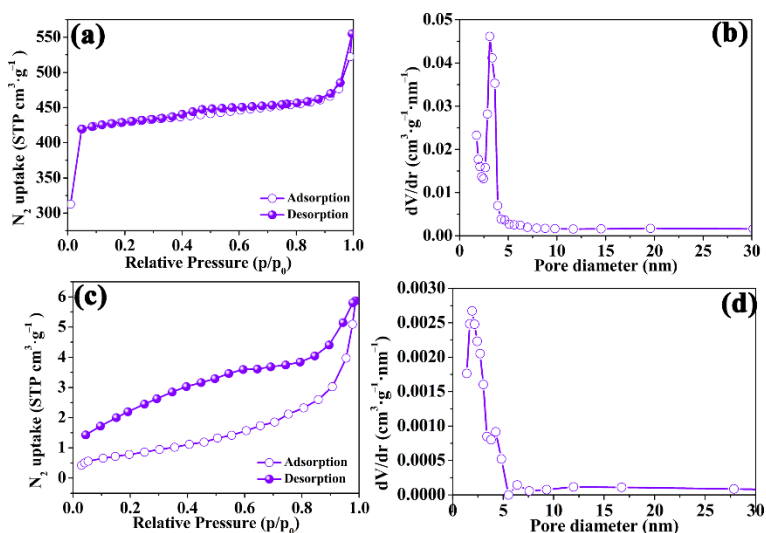

**Figure S5** (a) and (c)  $N_2$  adsorption-desorption isotherms of ZIF-67 nanoparticles and ZIF-67-PU after U(VI) adsorption, respectively, (b) and (d) pore size distribution plots of ZIF-67 nanoparticles and ZIF-67-PU after U(VI) adsorption, respectively, calculated using the BJH method.

**Table S1** Equations and nomenclatures of these kinetic models ( $q_e$  and  $q_t$  refer to the amounts of U(VI) adsorbed at equilibrium and designed time  $t$ , respectively).

| Equations                                                | nomenclatures                                                    |                                                 |
|----------------------------------------------------------|------------------------------------------------------------------|-------------------------------------------------|
| $q_t = q_e(1 - e^{-k_1 t})$                              | $k_1$ ( $\text{min}^{-1}$ )                                      | pseudo-first order rate constant                |
| $\frac{t}{q_t} = \frac{1}{2k_2 q_e^2} + \frac{1}{q_e} t$ | $k_2$ ( $\text{g} \cdot \text{mg}^{-1} \cdot \text{min}^{-1}$ )  | pseudo-second order rate constant               |
|                                                          | $k_i$ ( $\text{mg} \cdot \text{g}^{-1} \cdot \text{min}^{1/2}$ ) | intra-particle diffusion constant               |
| $q_t = k_i t^{1/2} + C$                                  | $C$                                                              | intercept in the intra-particle diffusion model |

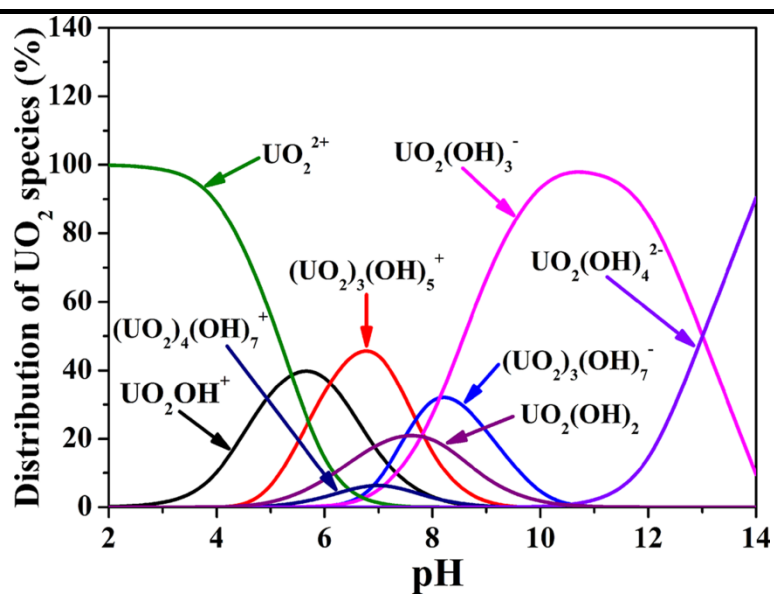

**Figure S6** Distribution of aqueous U(VI) species as a function of the pH values.

**Table S2** The percent content of U(VI) species under different pH values.

| Species                          | pH=3   | pH=4   | pH=5   | pH=6   | pH=7   |
|----------------------------------|--------|--------|--------|--------|--------|
| $\text{UO}_2^{2+}$               | 99.37% | 93.99% | 58.97% | 7.0%   | 0.2%   |
| $\text{UO}_2\text{OH}^+$         | 0.63%  | 37.20% | 44.15% | 36.64% | 12.66% |
| $(\text{UO}_2)_3(\text{OH})_5^+$ |        |        | 0.47%  | 36.64% | 54.50% |
| $(\text{UO}_2)_4(\text{OH})_7^+$ |        |        |        | 2.47%  | 8.37%  |
| $\text{UO}_2(\text{OH})_2$       |        |        | 0.59%  | 6.70%  | 20.06% |
| $(\text{UO}_2)_3(\text{OH})_7^-$ |        |        |        |        | 2.07%  |
| $\text{UO}_2(\text{OH})_3^-$     |        |        |        | 0.07%  | 2.00%  |
| Species                          | pH=8   | pH=9   | pH=10  | pH=11  | pH=12  |
| $\text{UO}_2^{2+}$               |        |        |        |        |        |
| $\text{UO}_2\text{OH}^+$         | 1.44%  | 0.044% |        |        |        |
| $(\text{UO}_2)_3(\text{OH})_5^+$ | 10.59  | 0.061% |        |        |        |
| $(\text{UO}_2)_4(\text{OH})_7^+$ | 2.13%  |        |        |        |        |
| $\text{UO}_2(\text{OH})_2$       | 22.81% | 6.98%  | 0.98%  |        |        |
| $(\text{UO}_2)_3(\text{OH})_7^-$ | 40.23% | 23.77% | 1.27%  |        |        |
| $\text{UO}_2(\text{OH})_3^-$     | 22.80% | 69.82% | 97.65% | 98.90% | 90.91% |

**Table S3** The concentration of Co released during the adsorption process with initial adsorbent concentration of  $m/V = 0.5 \text{ g}\cdot\text{L}^{-1}$ .

| $C_{\text{Co(U(VI))}} (\text{mg}\cdot\text{L}^{-1})$ | $C_{\text{Co}} (\text{g/L})/\text{ZIF-67}$ | $C_{\text{Co}} (\text{m}\cdot\text{L}^{-1})/\text{ZIF-67-PU}$ |
|------------------------------------------------------|--------------------------------------------|---------------------------------------------------------------|
|------------------------------------------------------|--------------------------------------------|---------------------------------------------------------------|

|    |                       |                       |
|----|-----------------------|-----------------------|
| 21 | $0.46 \times 10^{-2}$ | $0.41 \times 10^{-2}$ |
| 27 | $0.53 \times 10^{-2}$ | $0.47 \times 10^{-2}$ |
| 33 | $0.56 \times 10^{-2}$ | $0.53 \times 10^{-2}$ |
| 39 | $0.78 \times 10^{-2}$ | $0.65 \times 10^{-2}$ |
| 45 | $0.87 \times 10^{-2}$ | $0.70 \times 10^{-2}$ |

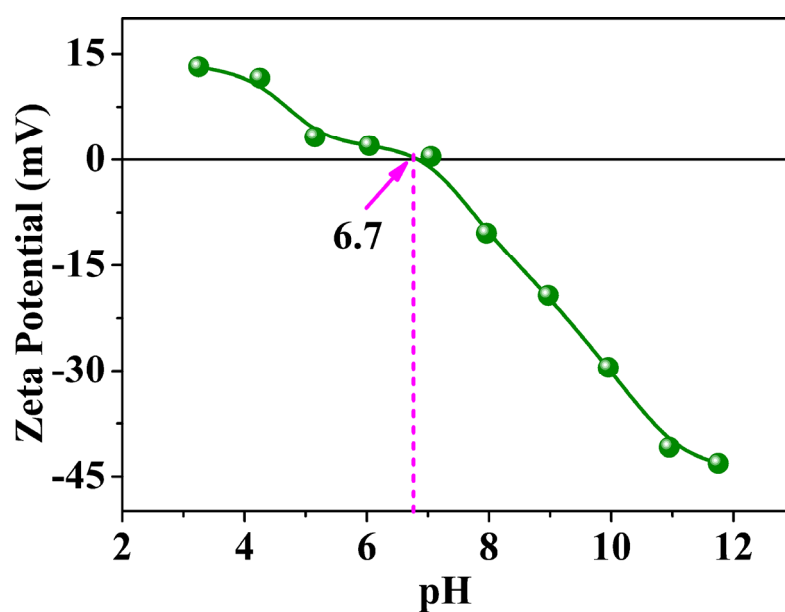

**Figure S7** Zeta potential of the obtained MOFs materials.

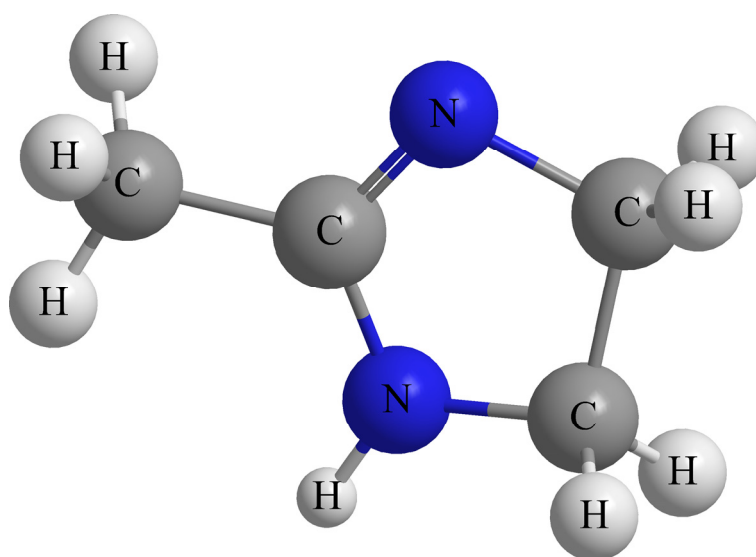

**Figure S8** Molecular structure of MeimiH.
